# Supplementary material
Source: MDPI journal article supplement (https://www.mdpi.com/2571-9408/6/6/236)

## Supplementary Materials

# Archaeometric Identification of a Perfume from Roman Times

Daniel Cosano <sup>1</sup>, Juan Manuel Román <sup>2</sup>, Fernando Lafont <sup>3</sup> and José Rafael Ruiz Arrebola <sup>1,\*</sup>

<sup>1</sup> Organic Chemistry Department, Instituto Químico para la Energía y el Medioambiente (IQUEMA), Sciences Faculty, University of Cordoba, 14071 Córdoba, Spain; q92cohid@uco.es

<sup>2</sup> Delegation of Historical Heritage, Museum of the City, 41410 Carmona, Spain; juanmarroman@gmail.com

<sup>3</sup> Centralized Research Support Service (SCAI), Mass Spectrometry and Chromatography Unit, University of Cordoba, 14071 Córdoba, Spain; fernandolafont@uco.es

\* Correspondence: qo1ruarj@uco.es; Tel.: +34-957-218638

**Figure S1.** Total ion chromatograms and extracted ion chromatograms of (a) m/z 247 and 262 ions (dimethylretenes); (b) m/z 233 and 248 ions (9-methylretene); (c) m/z 219 and 234 ions (retene); (d) m/z 217 ion (estearanes) and (e) m/z 191 ion (terpanes).

(a)

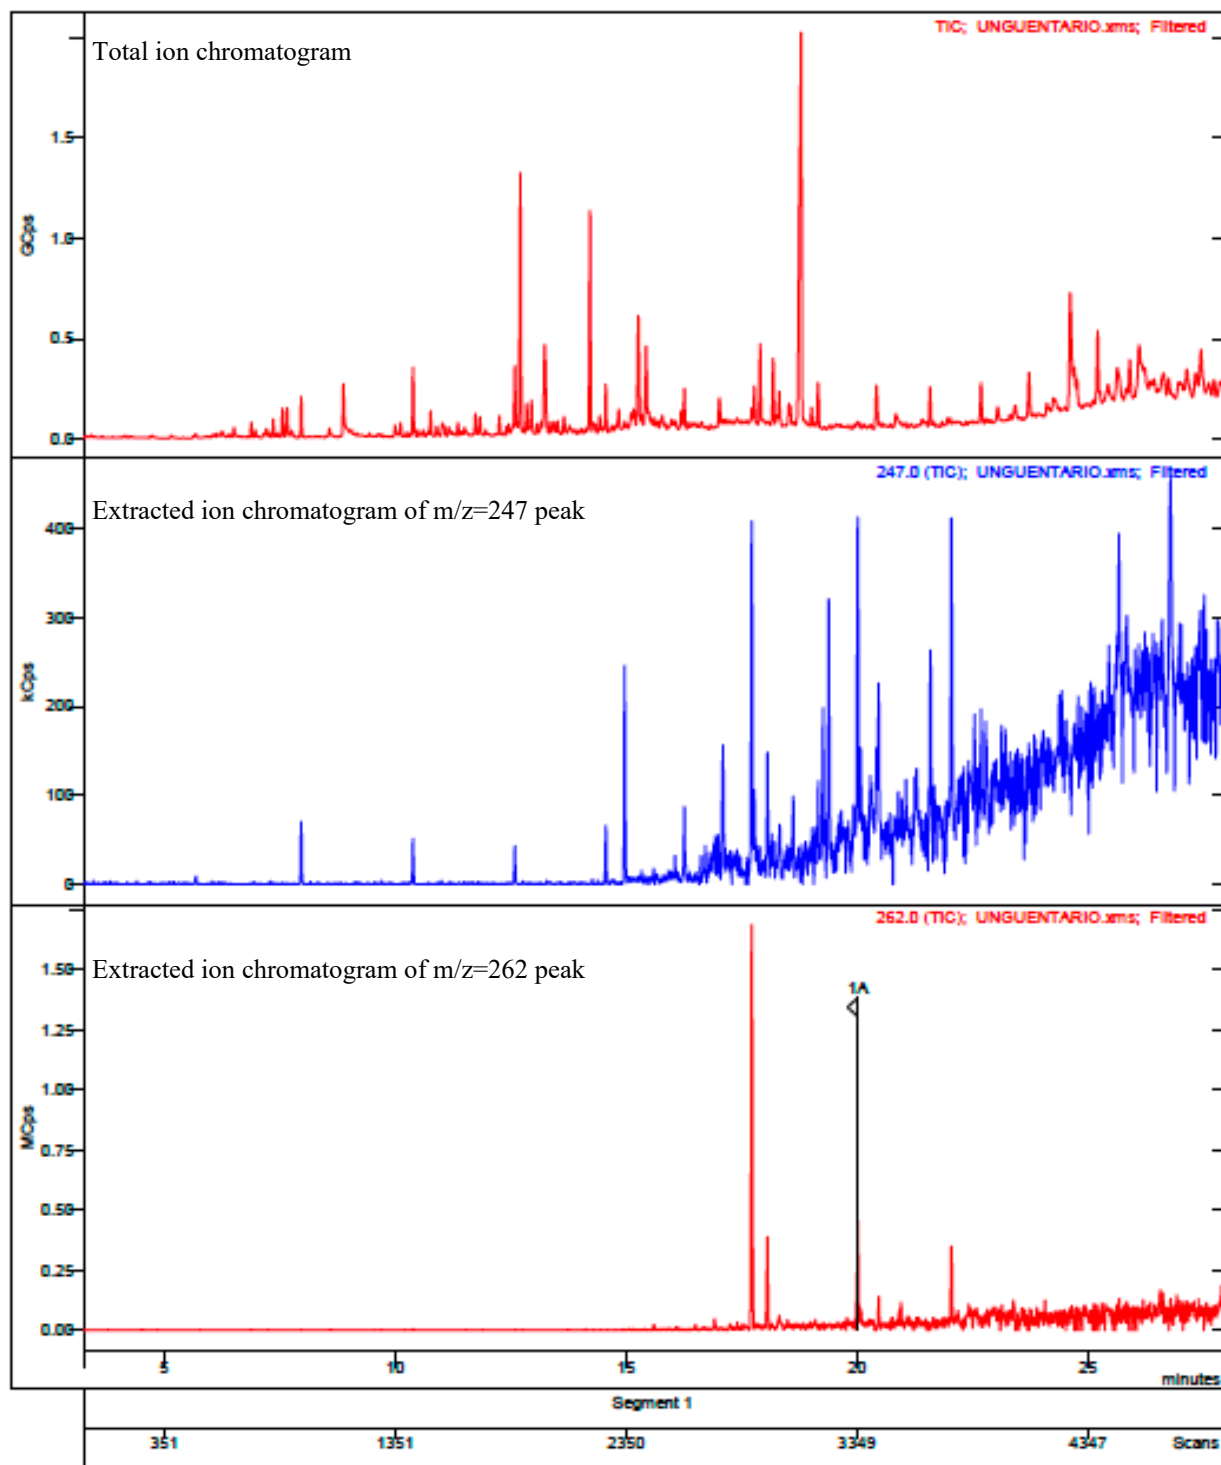

(b)

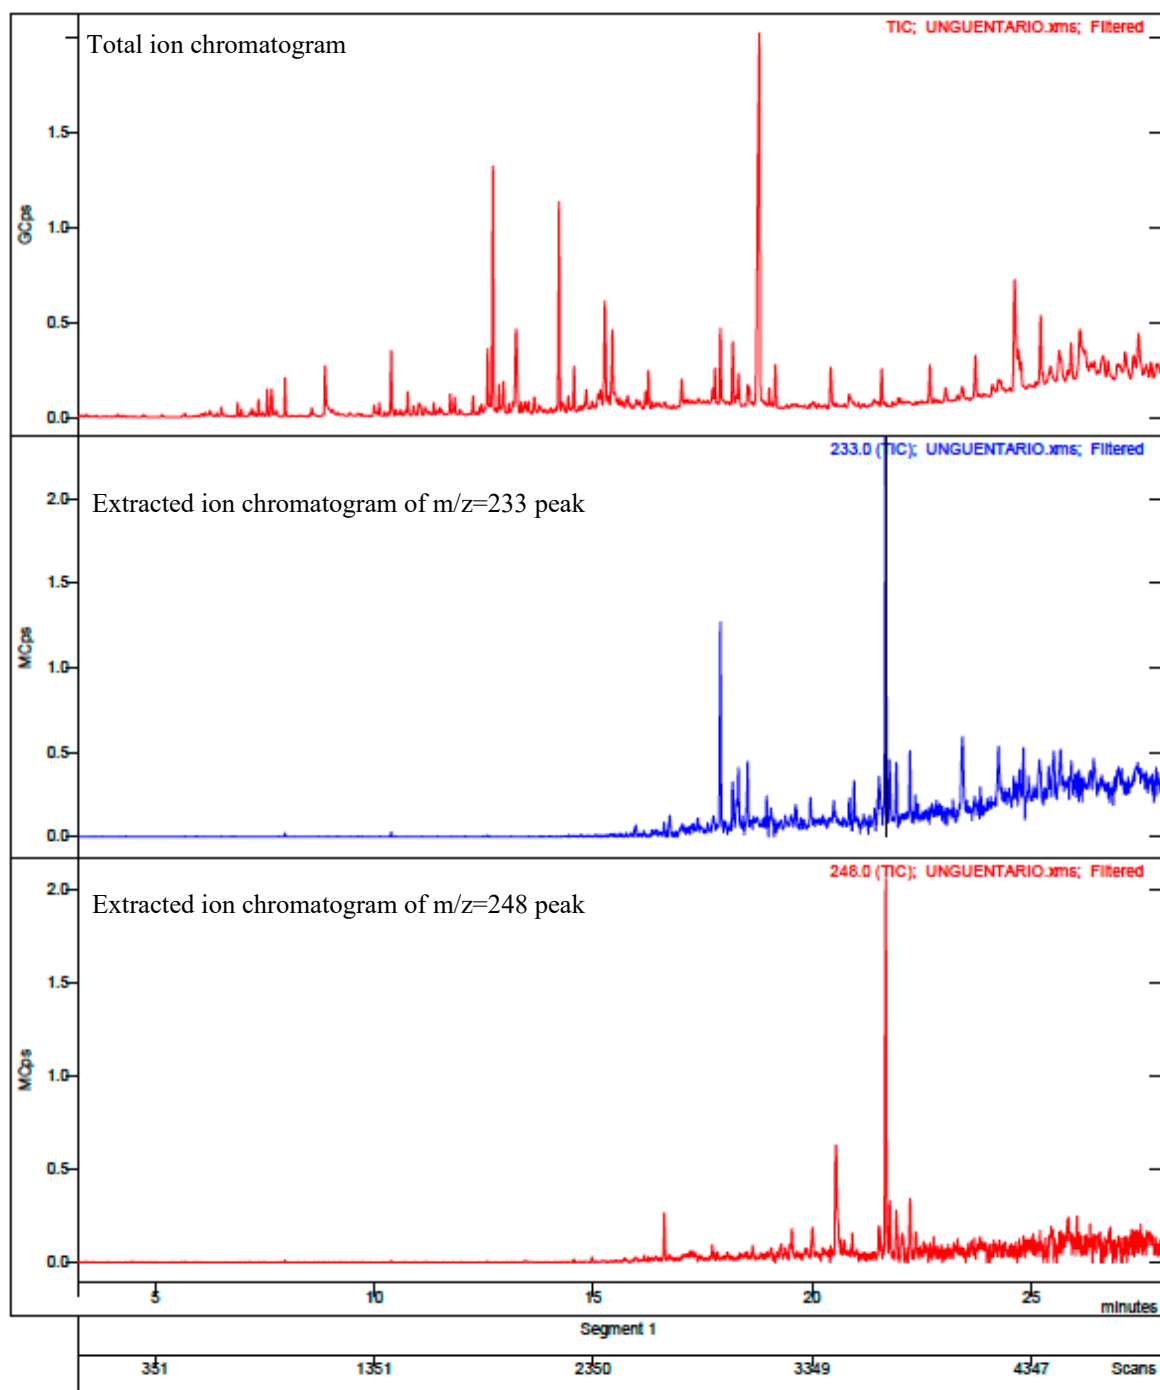

(c)

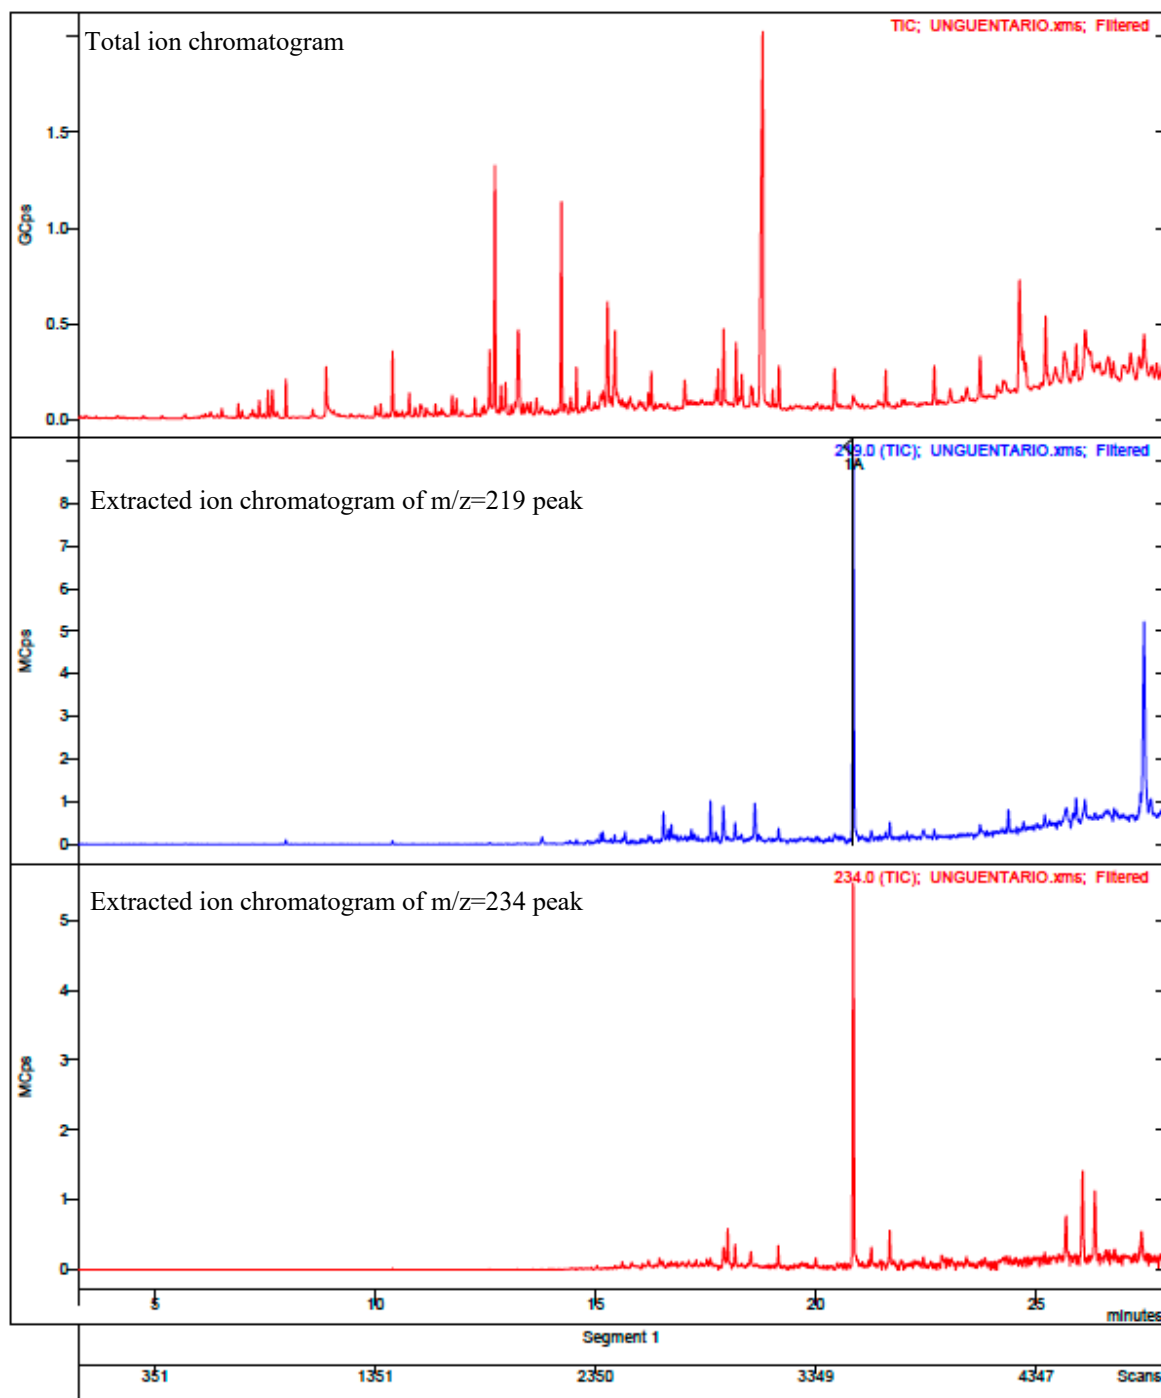

(d)

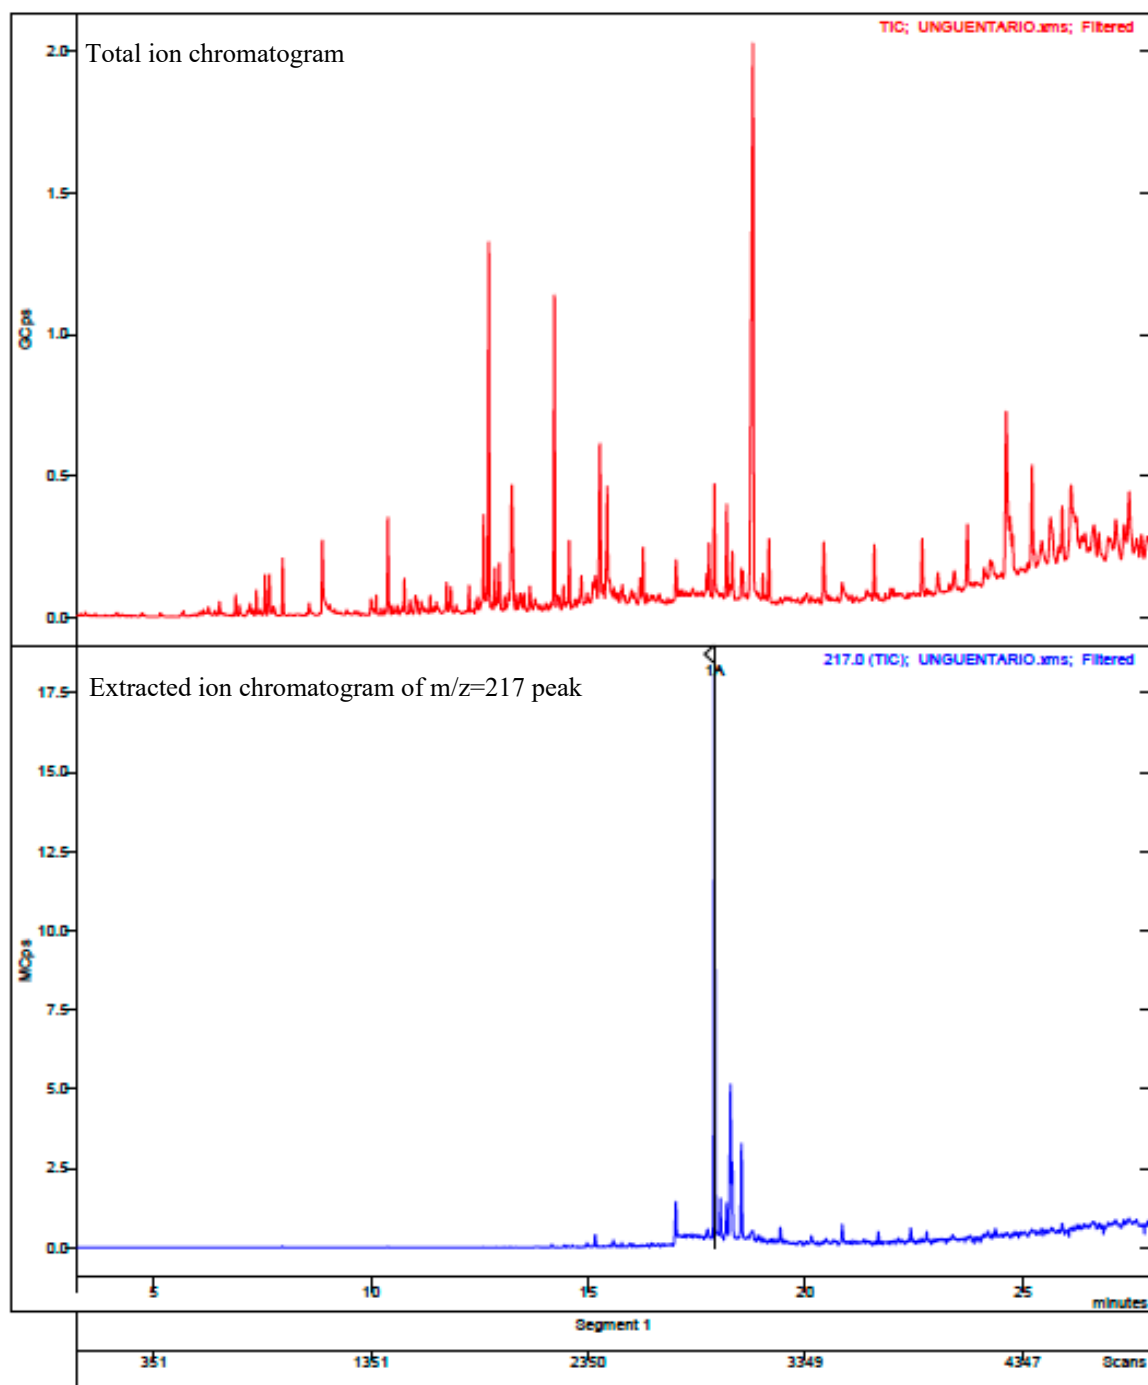

(e)

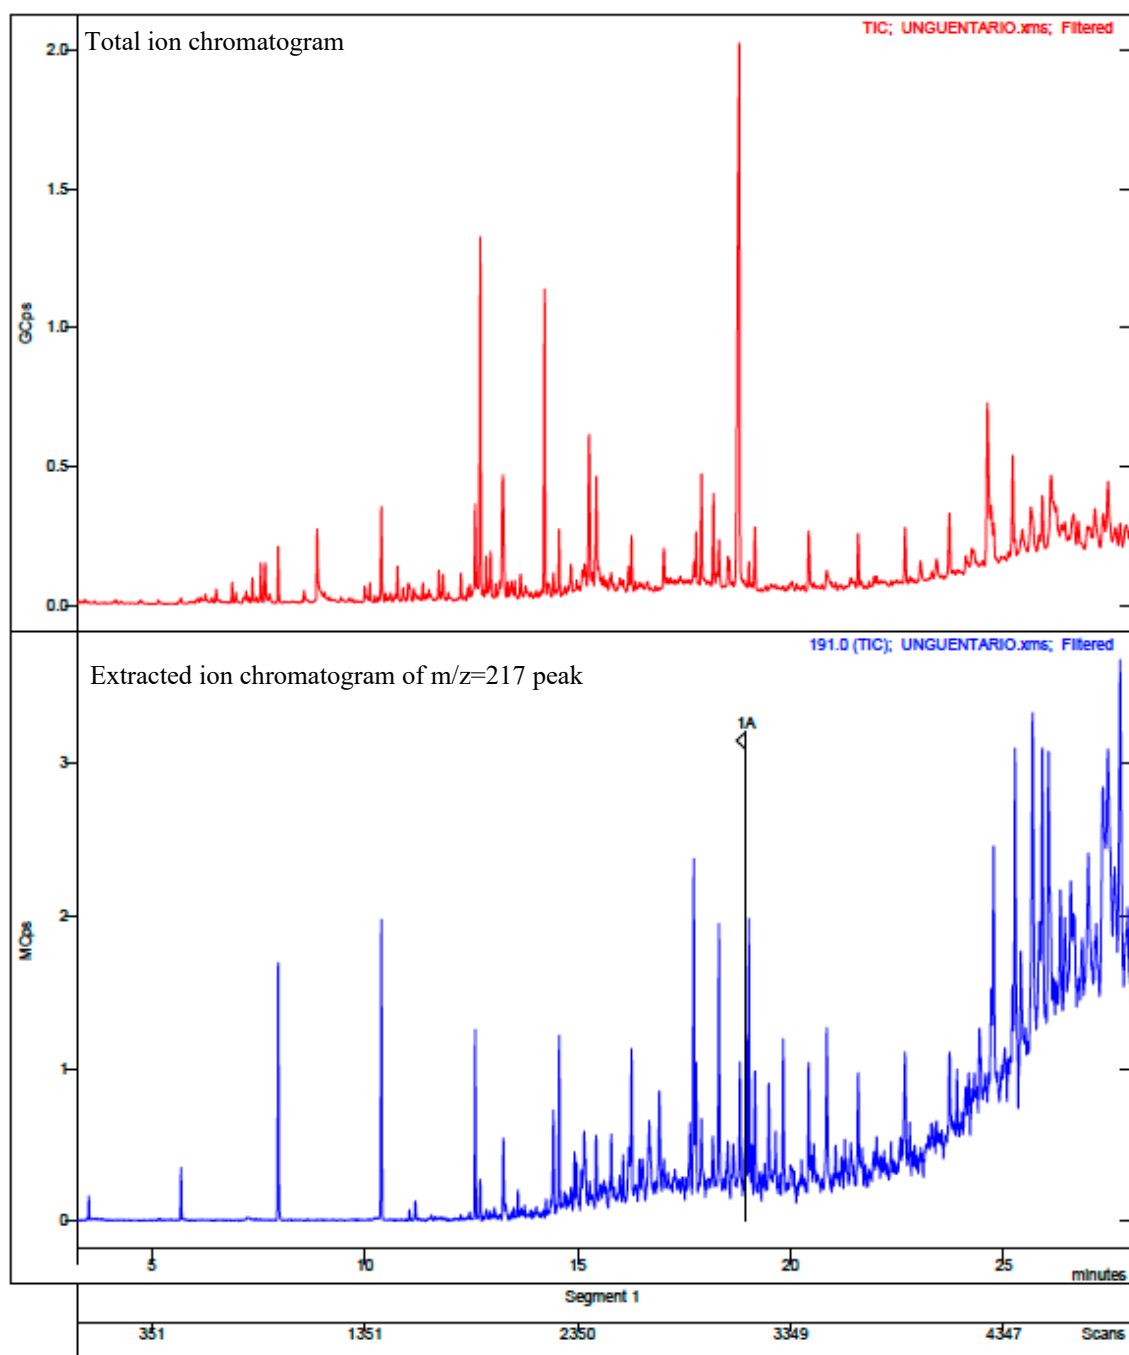

**Figure S2.** Chromatograms and mass spectra for selected compounds present in the *unguentarium* contents and also in the commercial patchouli oil.

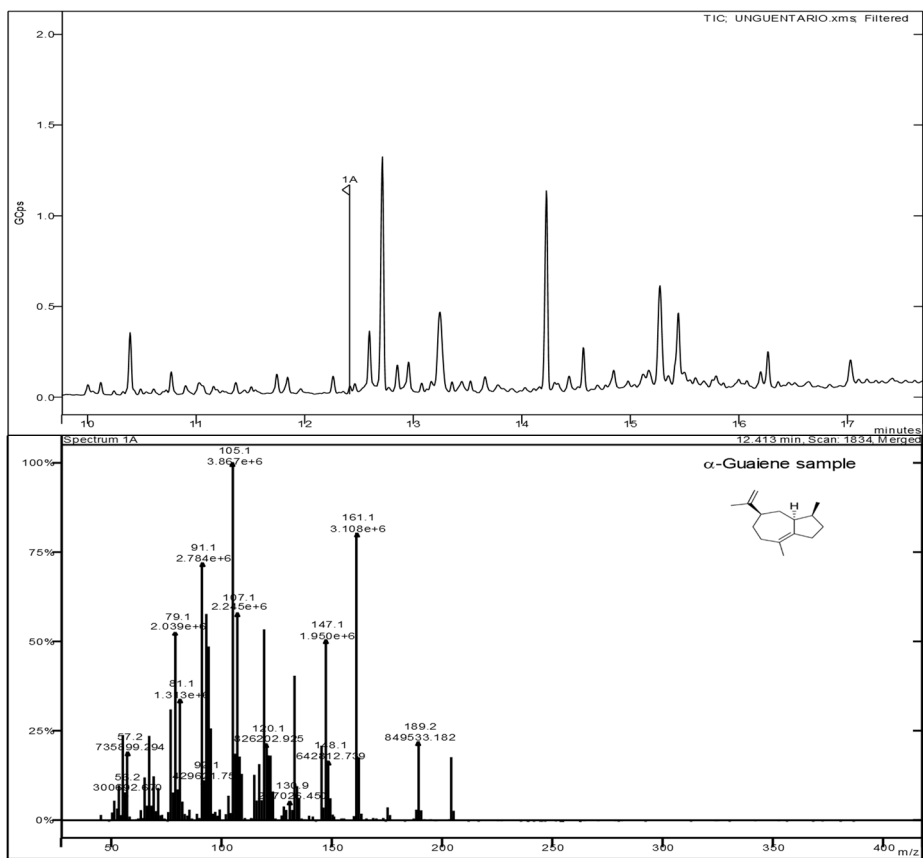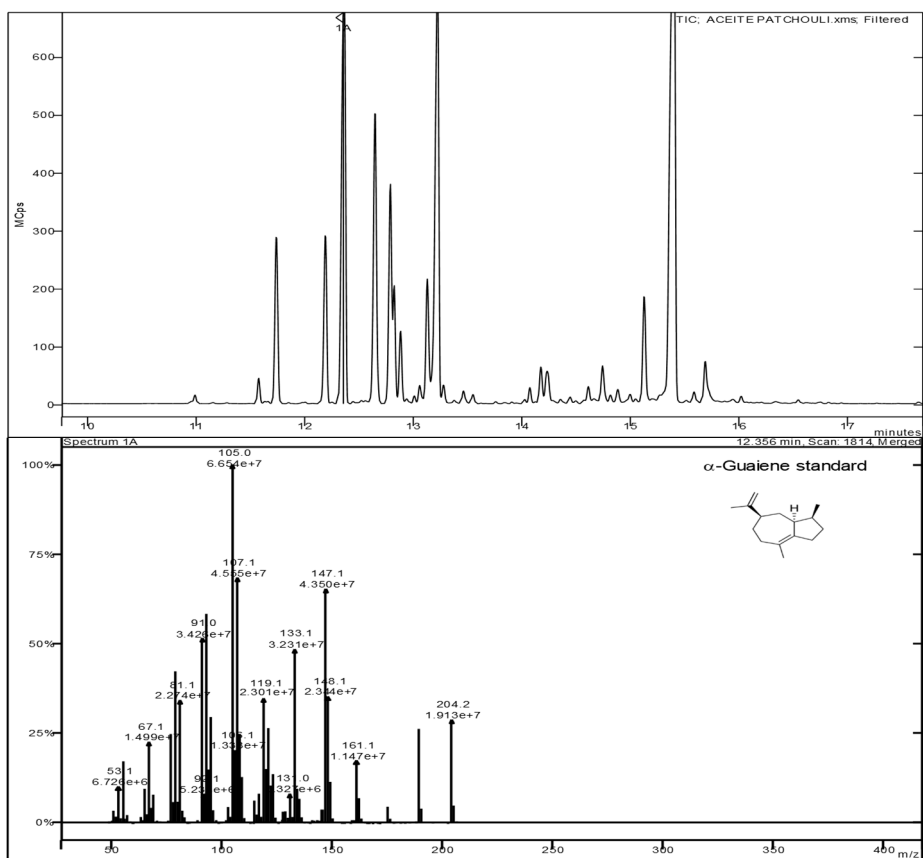

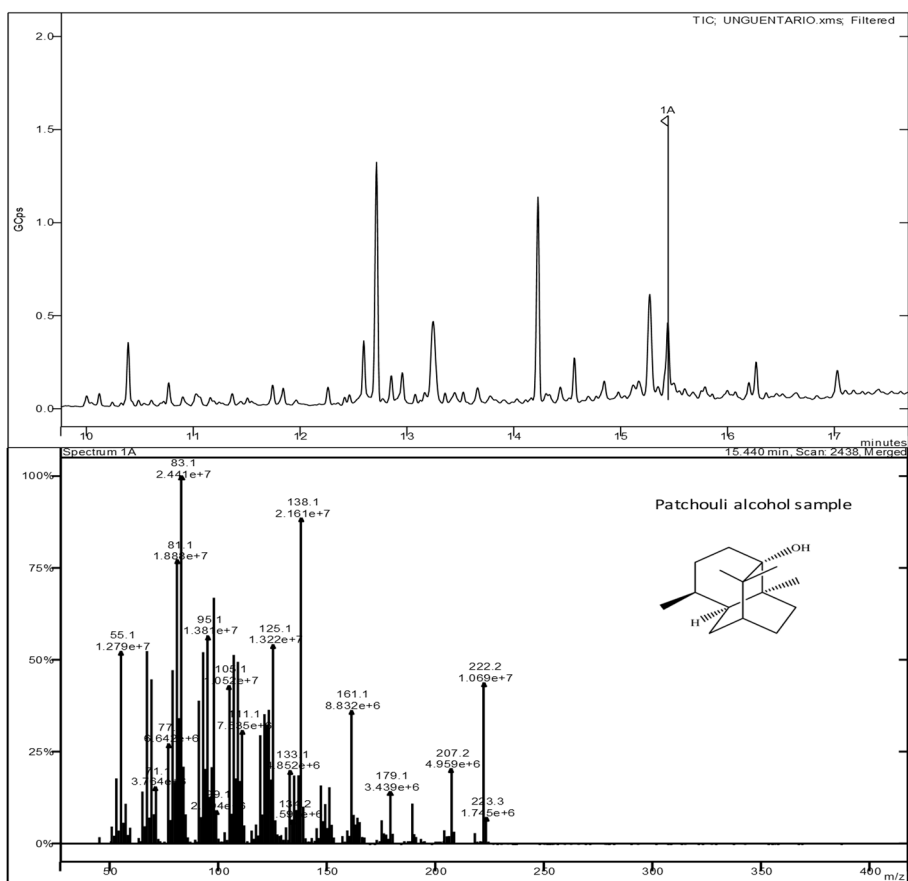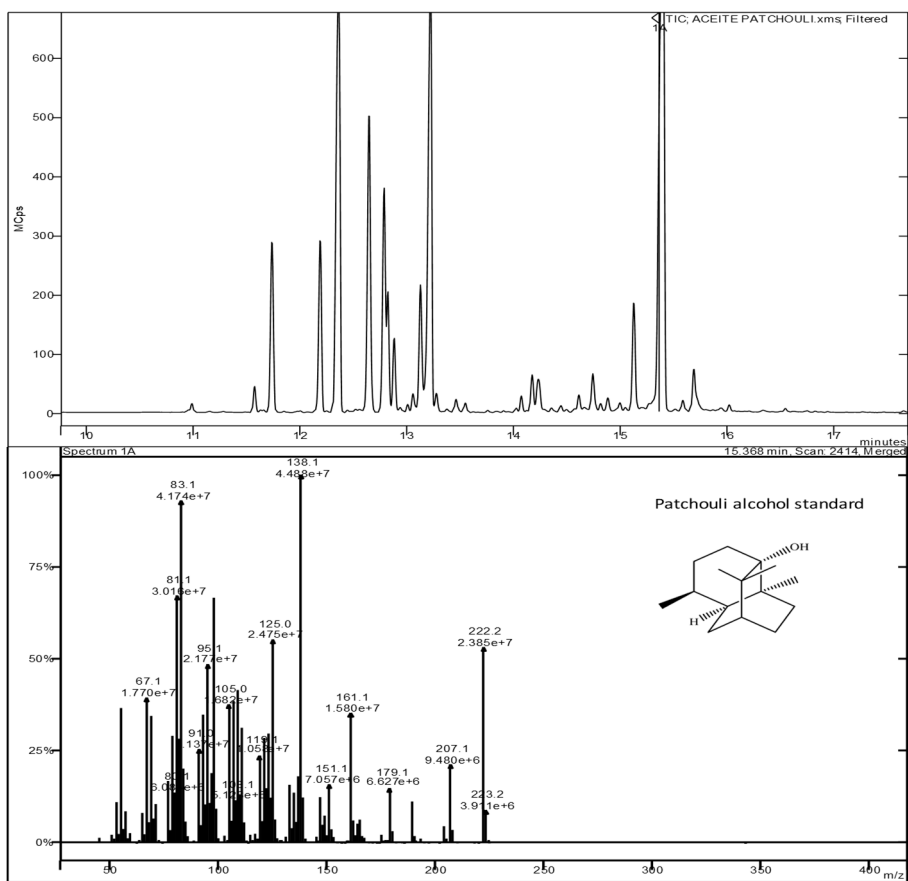



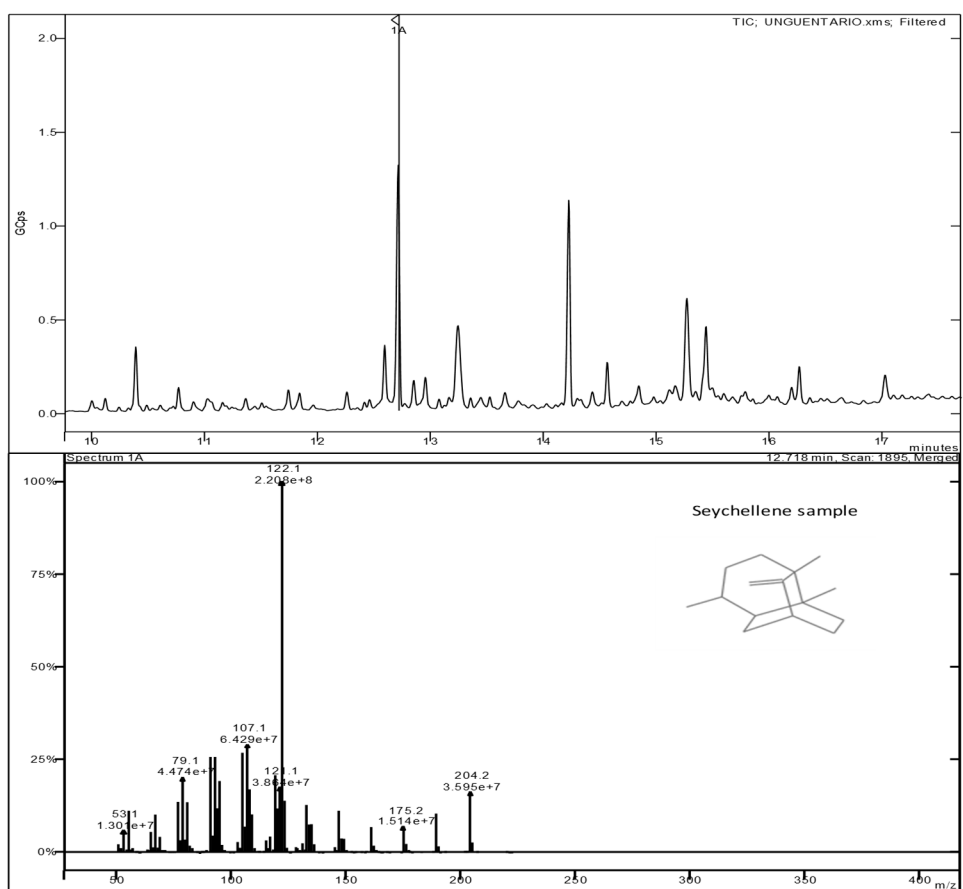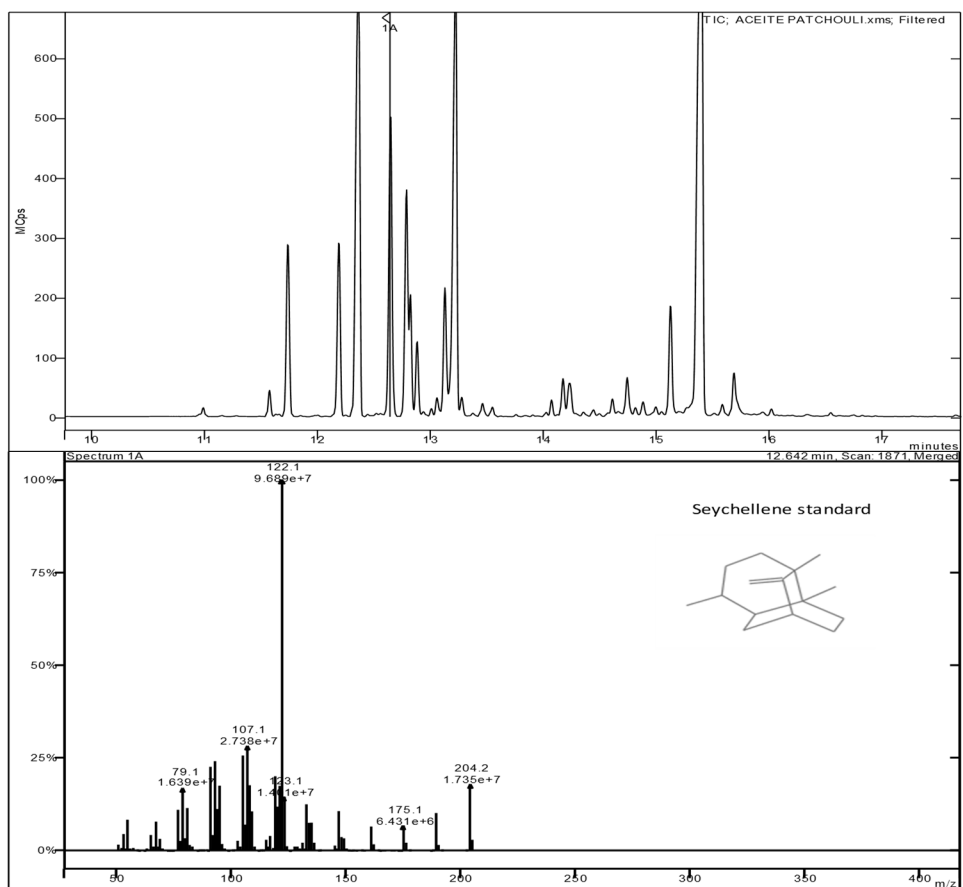

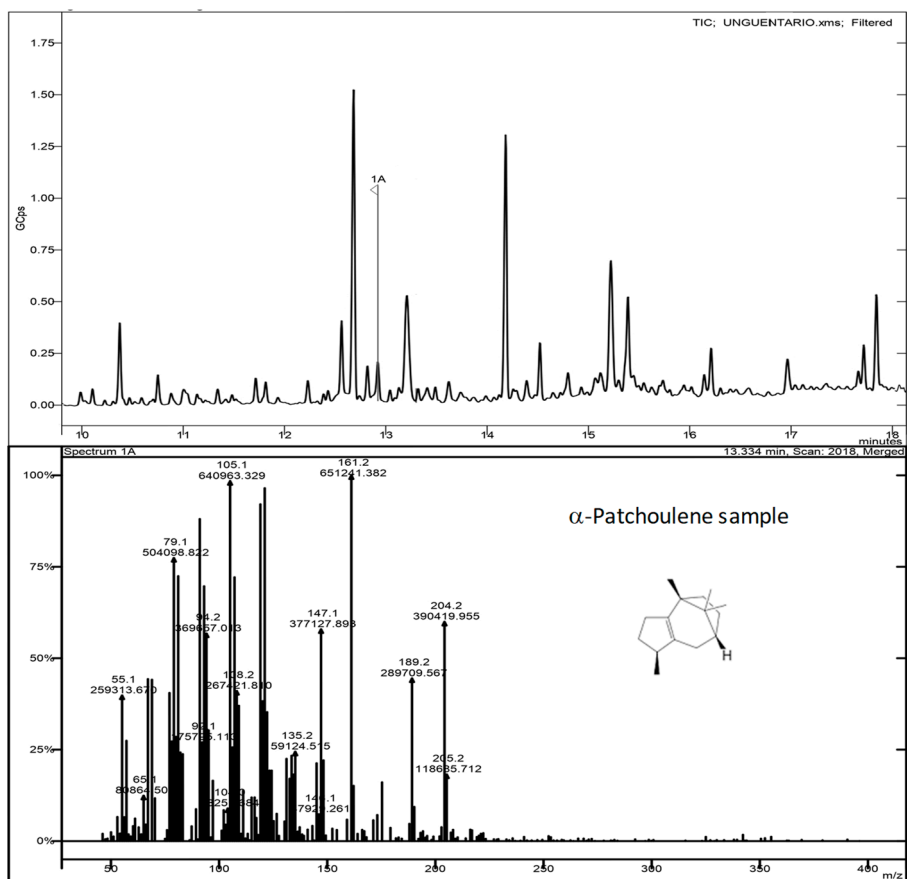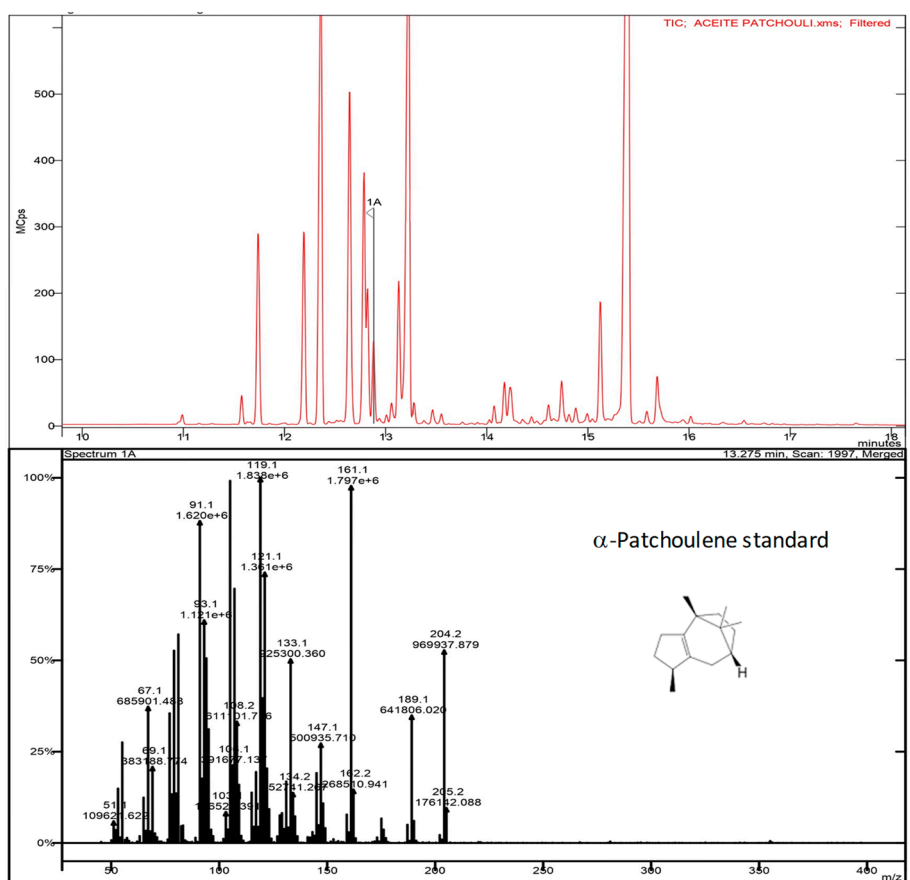

**Figure S3.** Extracted ion chromatograms of  $m/z$  204 for patchoulene ( $\alpha$ - and  $\beta$ -) (a) commercial patchouli oil (b) *unguentarium* contents; (c) mass spectrum for  $\beta$ -patchoulene.

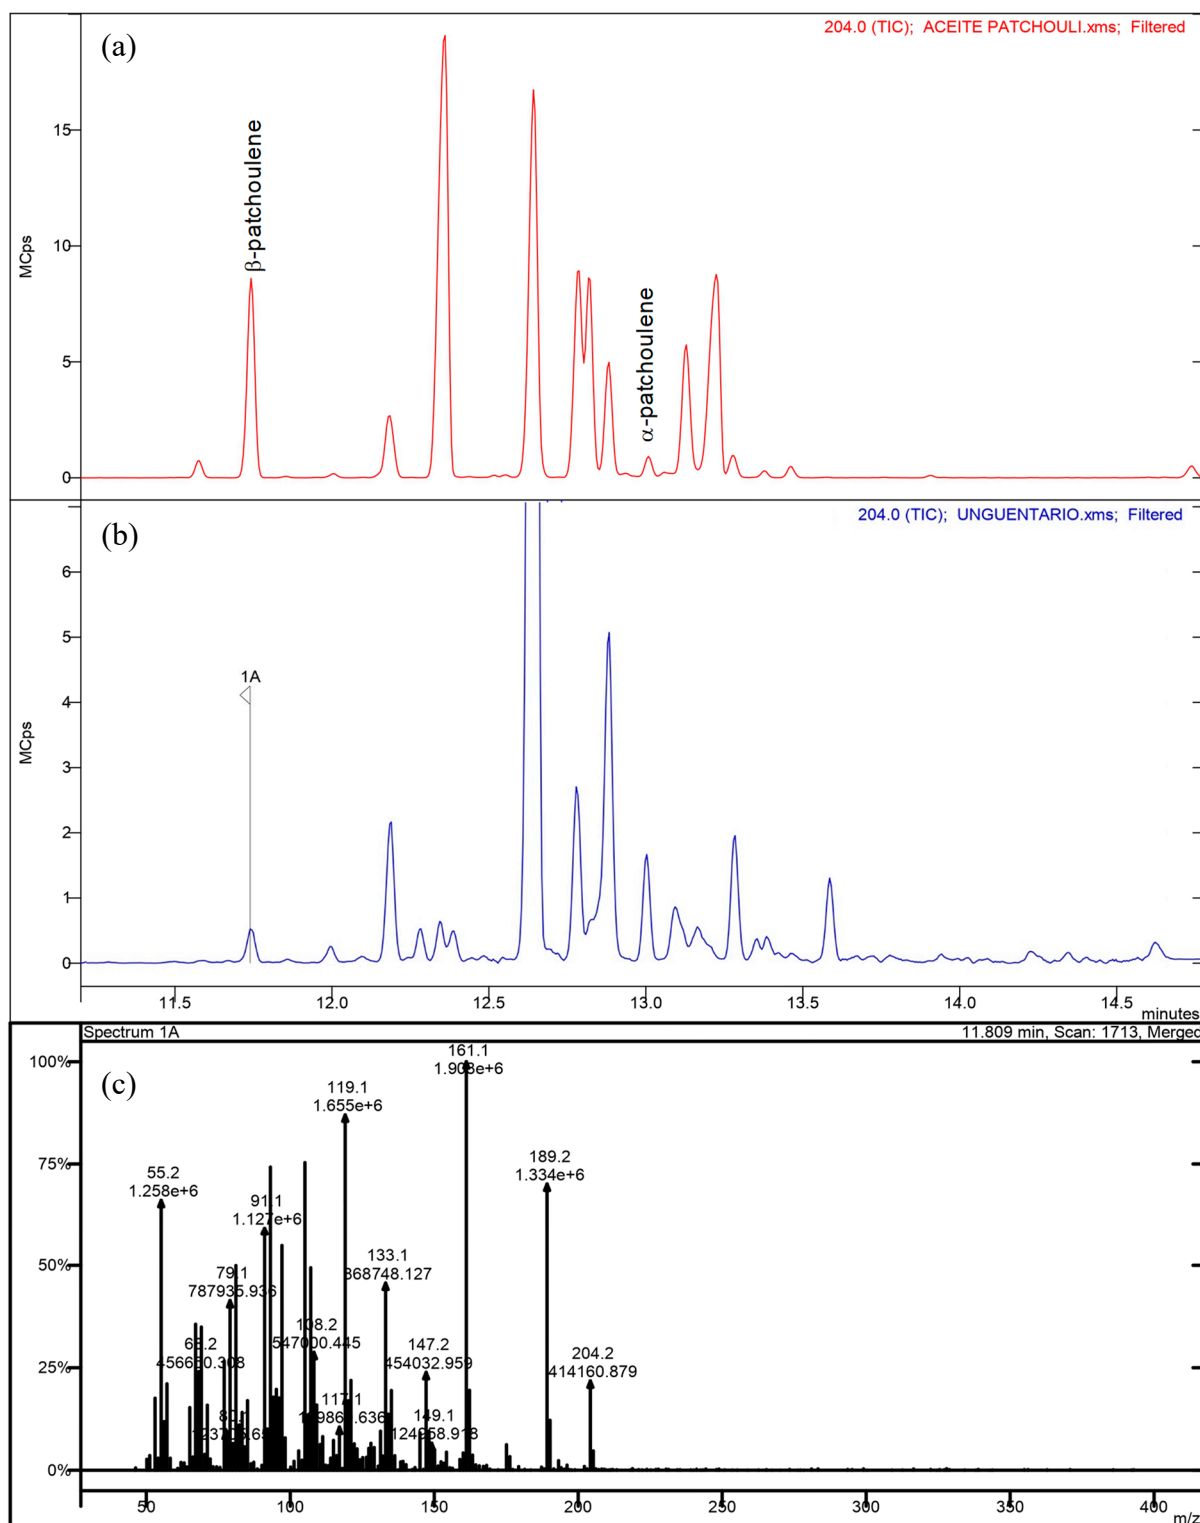

**Figure S4.** Extracted ion chromatograms of  $m/z$  222 for *unguentarium* contents (a) and nard oil (b).

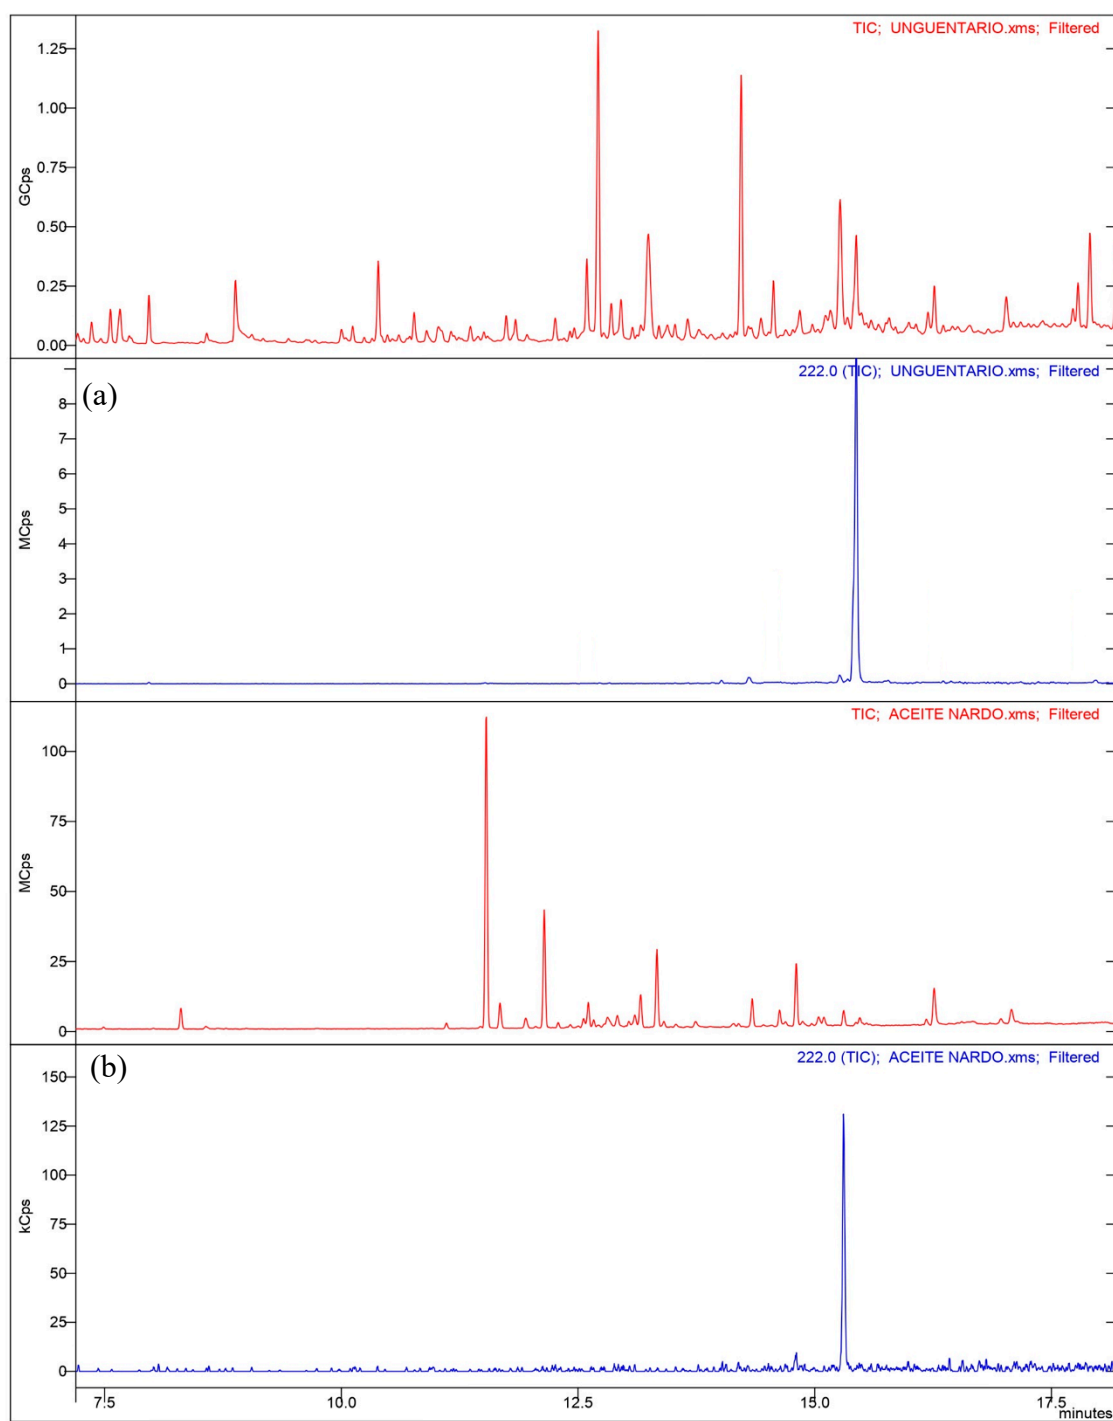

Supplement: s1 [file s1]
